# Supplementary material
Source: MDPI journal article supplement (https://www.mdpi.com/2673-7167/4/1/7)
Supplement: s1 [file s1]

Supplementary information

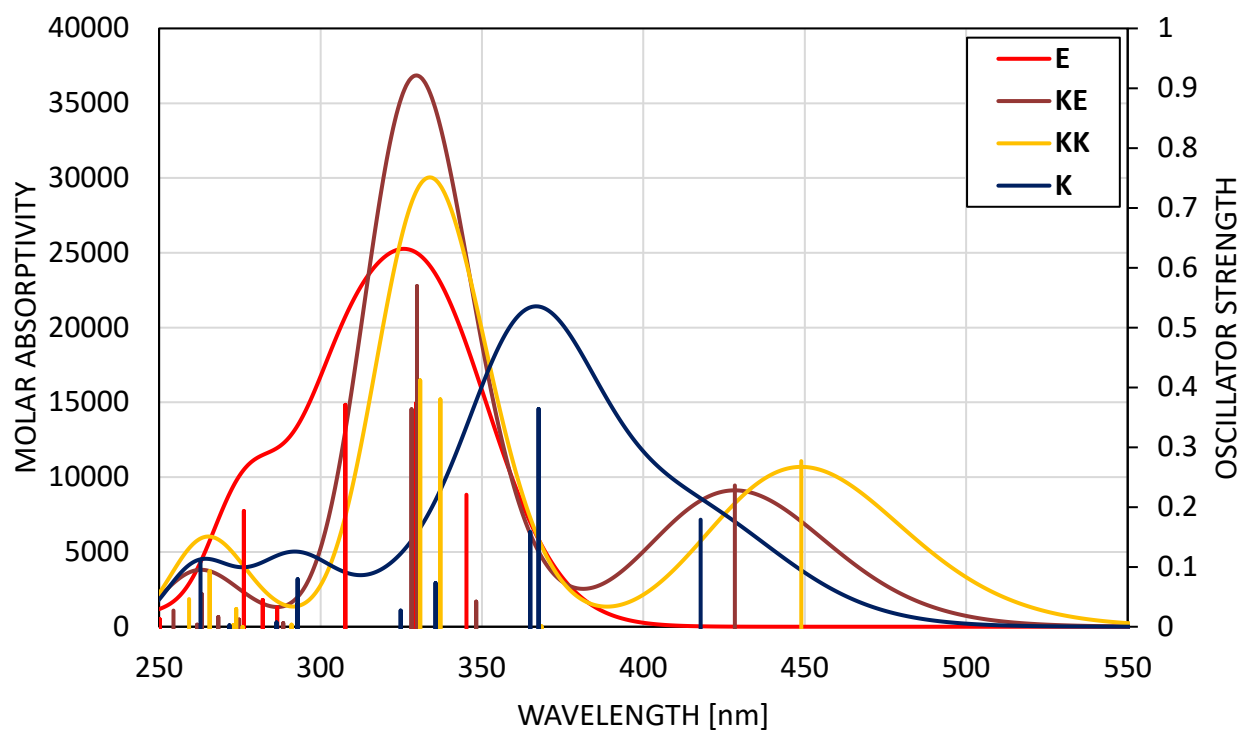

Figure S1. Predicted absorption spectra of the tautomers of **6** in acetonitrile.

Table S1. Relative energies of the tautomers of **6** and their spectral parameters in toluene and in acetonitrile (in brackets) in the ground state.

| Structure                                                                                        | $\alpha$<br>[°]<br>See<br>Scheme<br>2 | $\mu$<br>[D] | Relative energetics<br>[kcal/mol]<br>(M06-2X/TZVP) |              | UV-Vis*<br>(B3LYP/6-<br>311+G(2d,p)) |                | <sup>1</sup> H NMR<br>(M06-<br>2X/TZVP)<br>[ppm] |
|--------------------------------------------------------------------------------------------------|---------------------------------------|--------------|----------------------------------------------------|--------------|--------------------------------------|----------------|--------------------------------------------------|
|                                                                                                  |                                       |              | $\Delta E$                                         | $\Delta G$   | $\lambda_{\max}$<br>[nm]             | $f$            |                                                  |
| 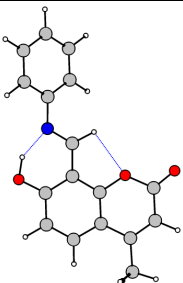<br><b>E</b>    | 0<br>(0)                              | 3.3<br>(4.1) | 0.0                                                | 0.0          | 348<br>(345)                         | 0.24<br>(0.22) | 15.0<br>(15.2)                                   |
| <b>TS(E-KE)</b>                                                                                  | 1<br>(1)                              | 2.1<br>(2.5) | 4.7<br>(4.1)                                       | 3.0<br>(2.2) |                                      |                |                                                  |
| <br><b>KE</b>  | 1<br>(0)                              | 1.8<br>(1.9) | 2.8<br>(1.76)                                      | 3.5<br>(2.4) | 439<br>(428)                         | 0.24<br>(0.24) | 15.4<br>(15.0)                                   |
| <b>TS(KE-KK)</b>                                                                                 | 90<br>(90)                            | 6.2<br>(6.4) | 32<br>(26)                                         | 33<br>(27)   |                                      |                |                                                  |
| <br><b>KK</b> | 180<br>(179)                          | 1.3<br>(1.7) | 7.3<br>(6.0)                                       | 8.0<br>(6.7) | 459<br>(449)                         | 0.31<br>(0.28) | 11.0<br>(11.1)                                   |
|                                                                                                  | N/A                                   | N/A          | N/A                                                | N/A          |                                      |                |                                                  |

|                                                                                                   |              |               |            |            |              |                |                |
|---------------------------------------------------------------------------------------------------|--------------|---------------|------------|------------|--------------|----------------|----------------|
| 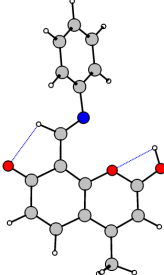 <p><b>K</b></p> | 176<br>(174) | 8.5<br>(10.9) | 32<br>(30) | 32<br>(29) | 434<br>(418) | 0.17<br>(0.18) | 6.67<br>(7.11) |
|---------------------------------------------------------------------------------------------------|--------------|---------------|------------|------------|--------------|----------------|----------------|

\*  $S_0$ - $S_1$  transition, the entire spectra are presented in Figures 1 and S1.

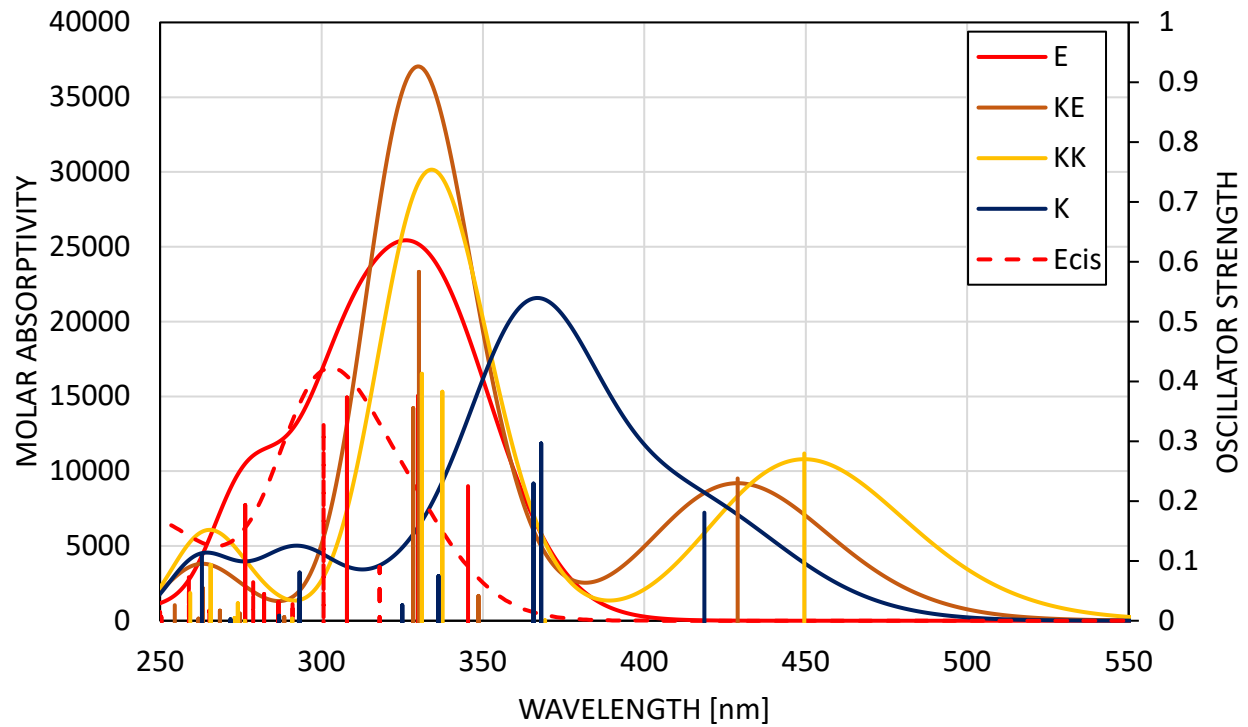

Figure S2. Predicted absorption spectra of the tautomers and isomers of **6** in ethanol.
